# Supplementary material for: An Hg2+-selective chemosensor based on the self-assembly of a novel amphiphilic block copolymer bearing rhodamine 6G derivative moieties in purely aqueous media
Source: Royal Society of Chemistry journal article supplement (doi:10.1039/c5ay00155b), 2015-01-01
Supplement: c5ay00155b1.pdf [file c5ay00155b1.pdf]

## Electronic Supplementary Information

### **Hg<sup>2+</sup>-selective chemosensor based on a novel amphiphilic block copolymer bearing rhodamine 6G derivative moieties self-assembly in purely aqueous media**

Zhao Wang,<sup>\*a</sup> Zhongkui Yang,<sup>a</sup> Tao Gao,<sup>a</sup> Jingwen He,<sup>a</sup> Laijiang Gong,<sup>a</sup> Yanbing Lu,<sup>a</sup> Yuanqin Xiong<sup>\*a</sup> and Weijian Xu<sup>a</sup>

<sup>a</sup> College of Chemistry & Chemical Engineering, Hunan University, Changsha, China.

Tel: +86-0731-88821549, E-mail addresses: wangzhao0724@163.com (Z. Wang), xyuanqin@sina.com (Y. Q. Xiong)

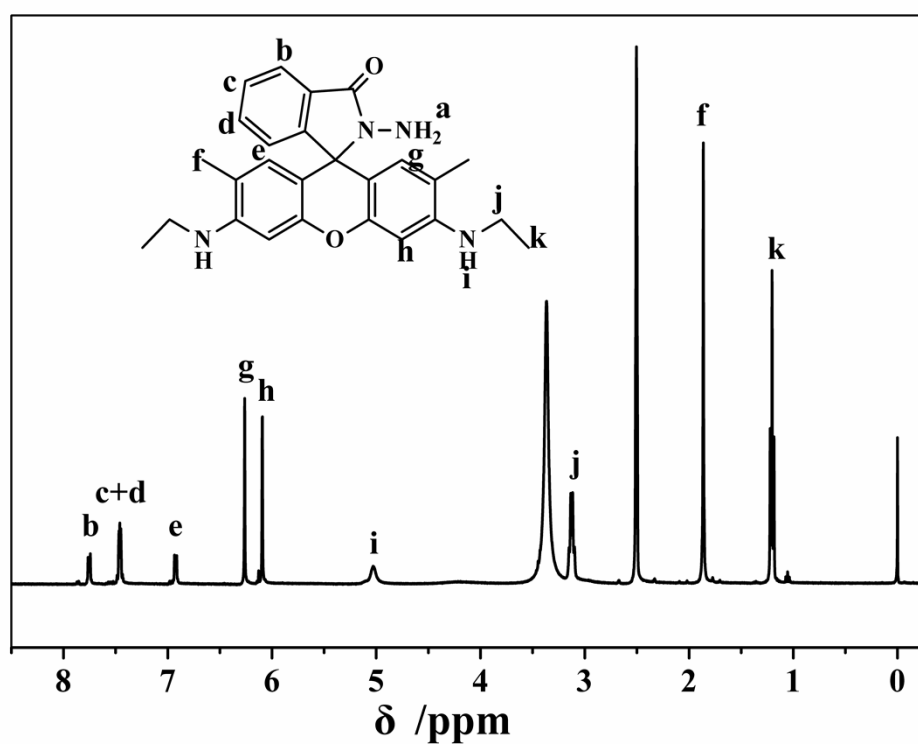

Figure S1. <sup>1</sup>H NMR spectra recorded for **compound 1** in d<sub>6</sub>-DMSO

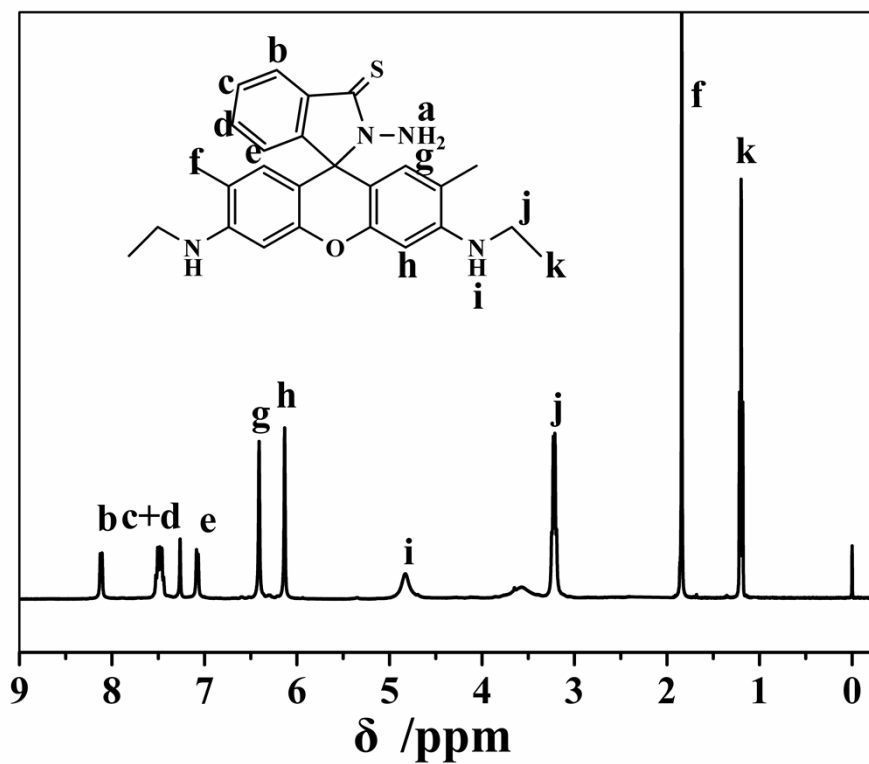

Figure S2. <sup>1</sup>H NMR spectra recorded for **compound 2** in CDCl<sub>3</sub>

wzh-141120-444 #27 RT: 0.49 AV: 1 SB: 4 0.03-0.08 NL: 2.07E7  
T: + c ESI ms [ 50.00-1000.00]

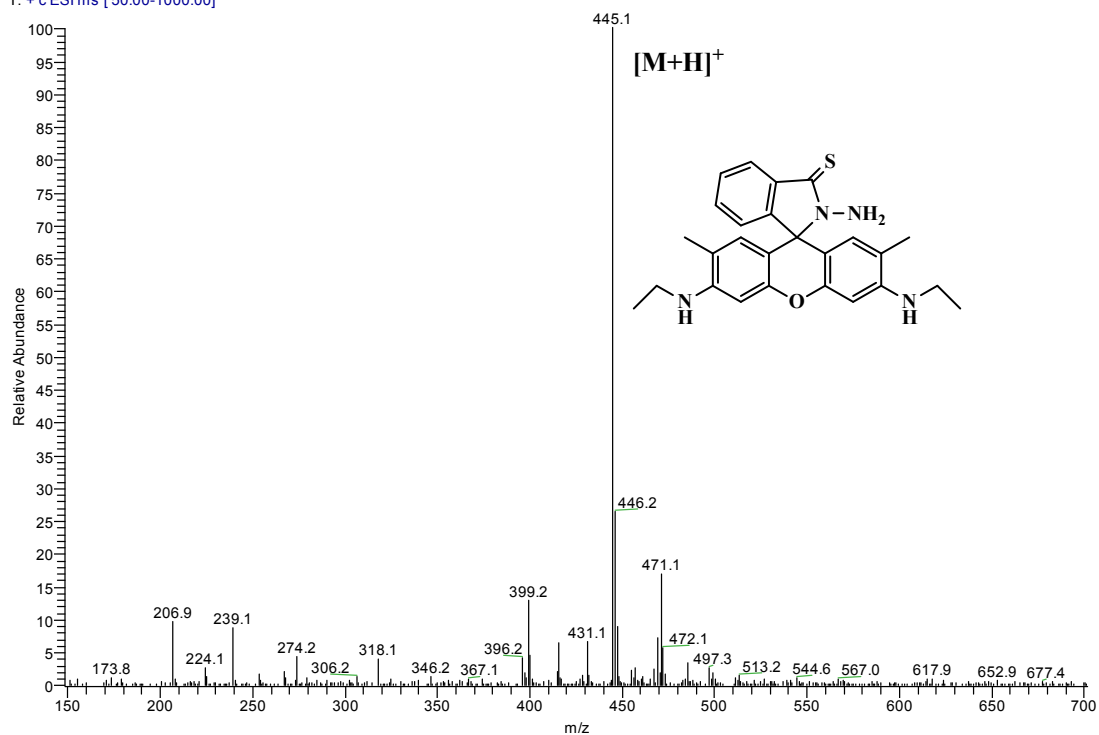

Figure S3. ESI-MS spectra for **compound 2**

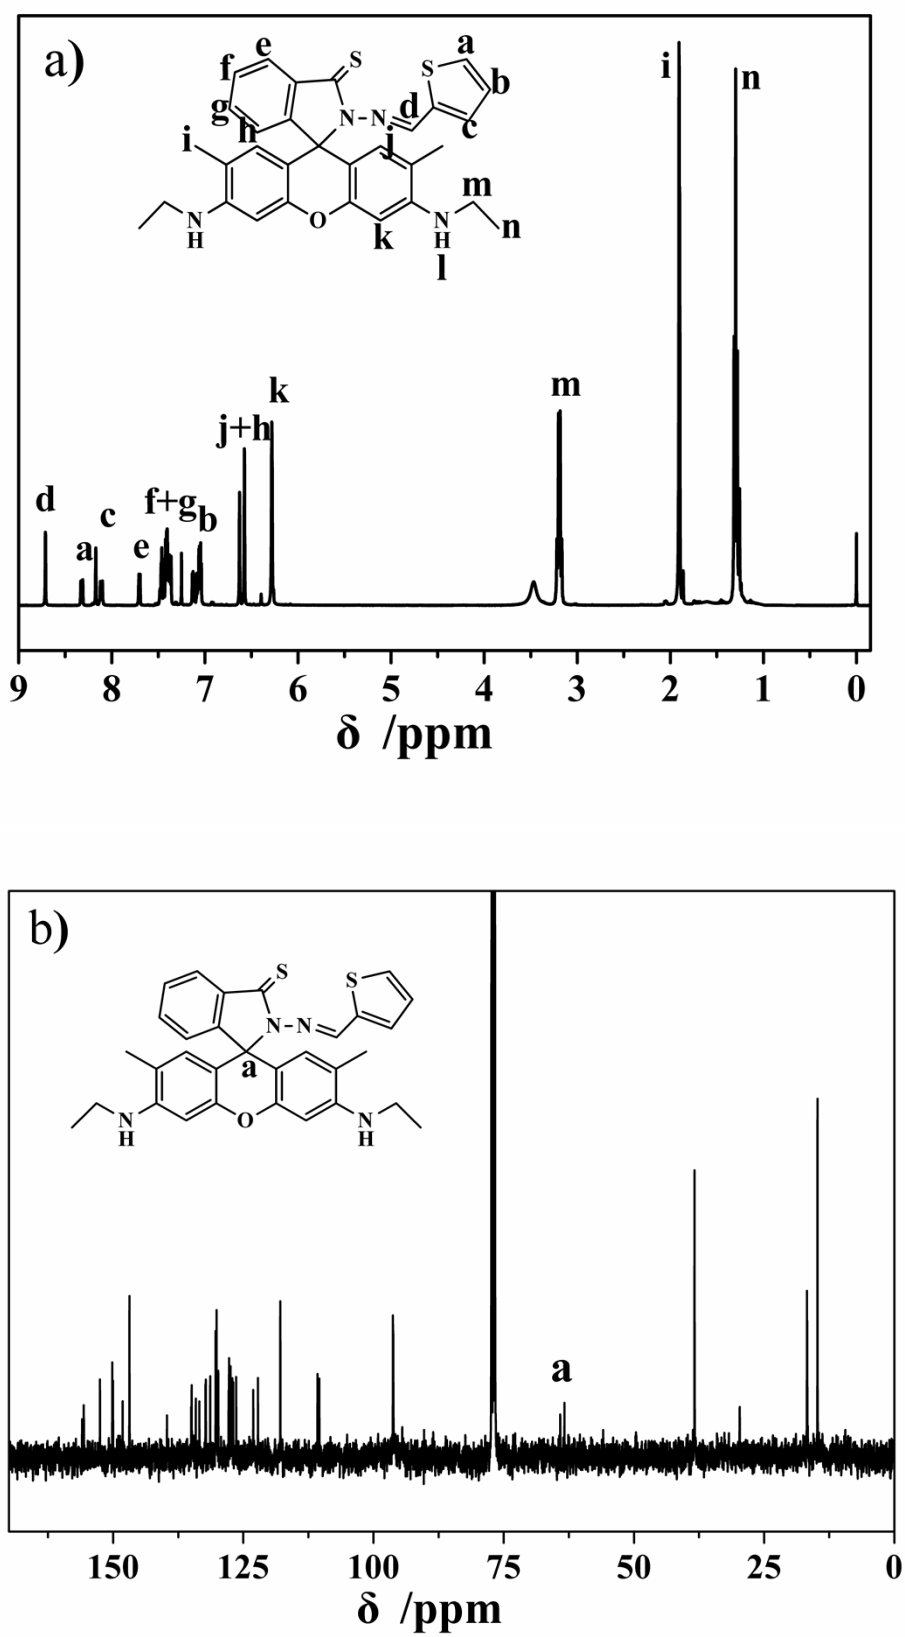

wzh-140917-538 #34 RT: 0.62 AV: 1 SB: 4 0.17-0.22 NL: 3.91E7  
T: + c ESI ms [50.00-1000.00]

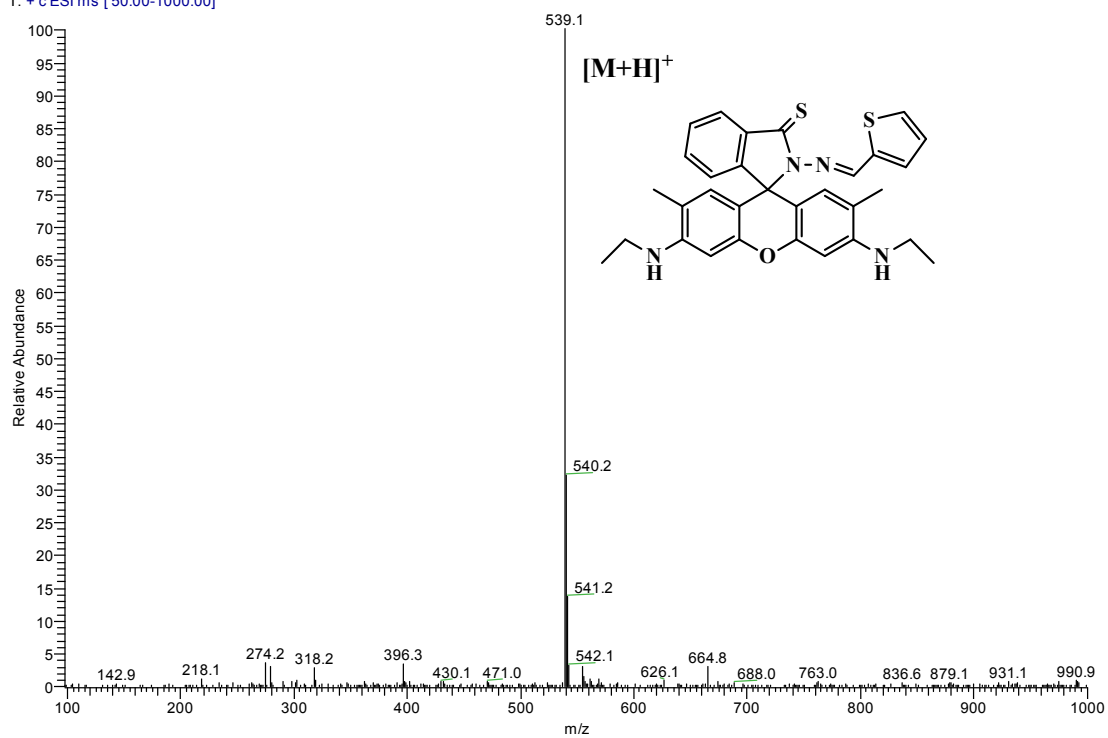

Figure S5. ESI-MS spectra for compound 3

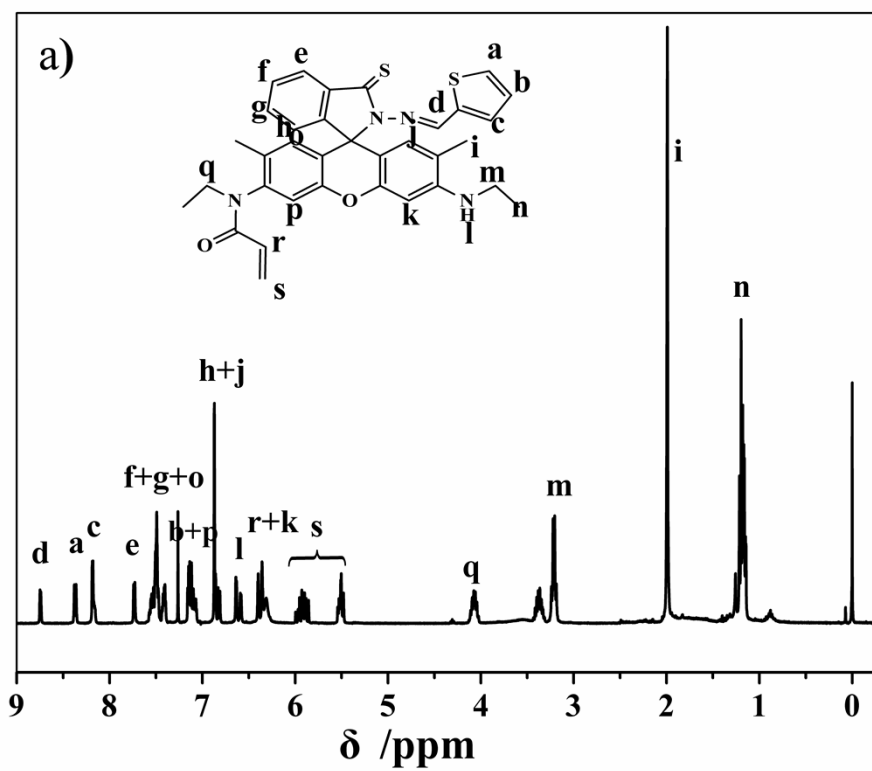

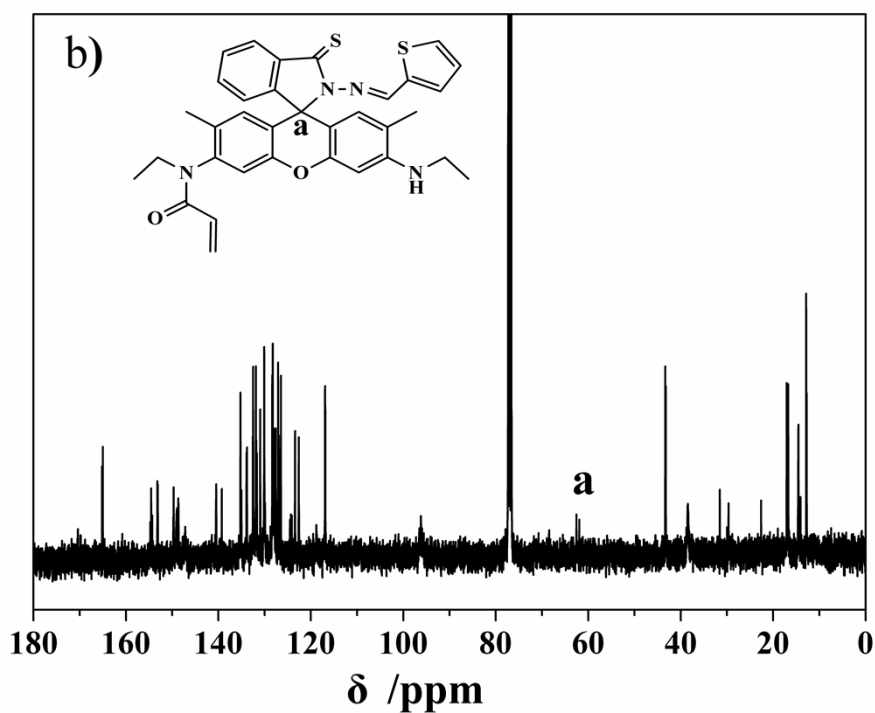

Figure S6. (a)  $^1\text{H}$  NMR and (b)  $^{13}\text{C}$  NMR spectra recorded for **compound 4** in  $\text{CDCl}_3$

wzh-140903-592-2 #3 RT: 0.09 AV: 1 NL: 1.20E7  
T: + c ESI ms [ 50.00-1500.00]

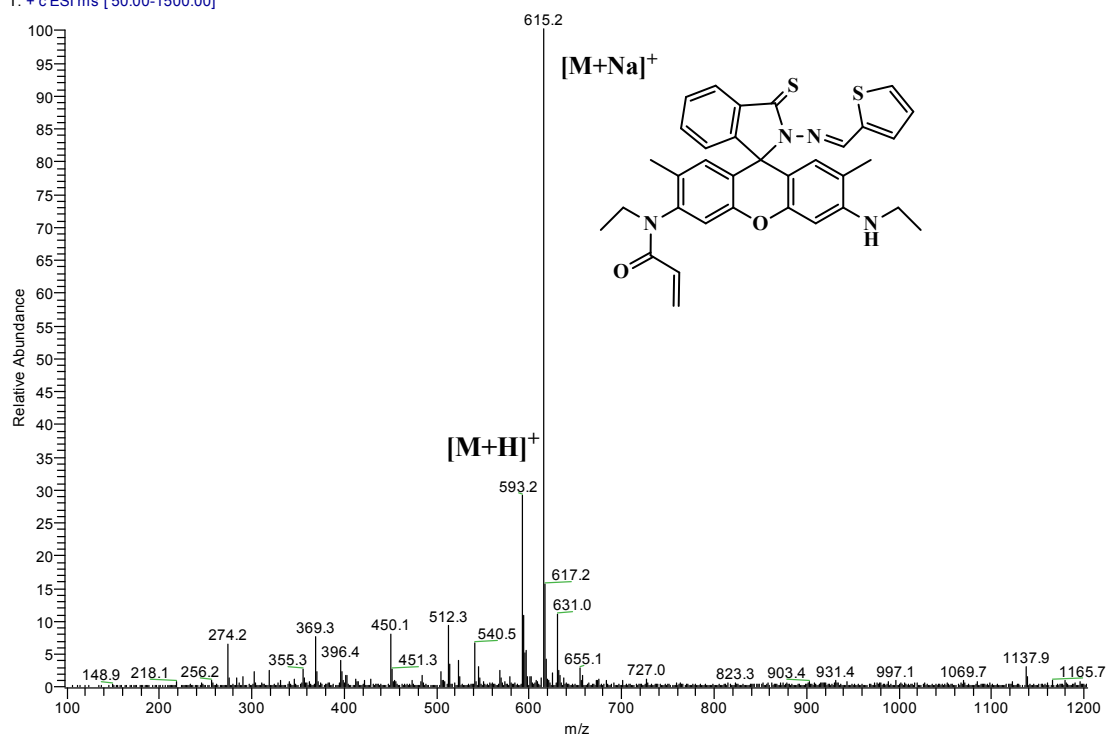

Figure S7. ESI-MS spectra for **compound 4**

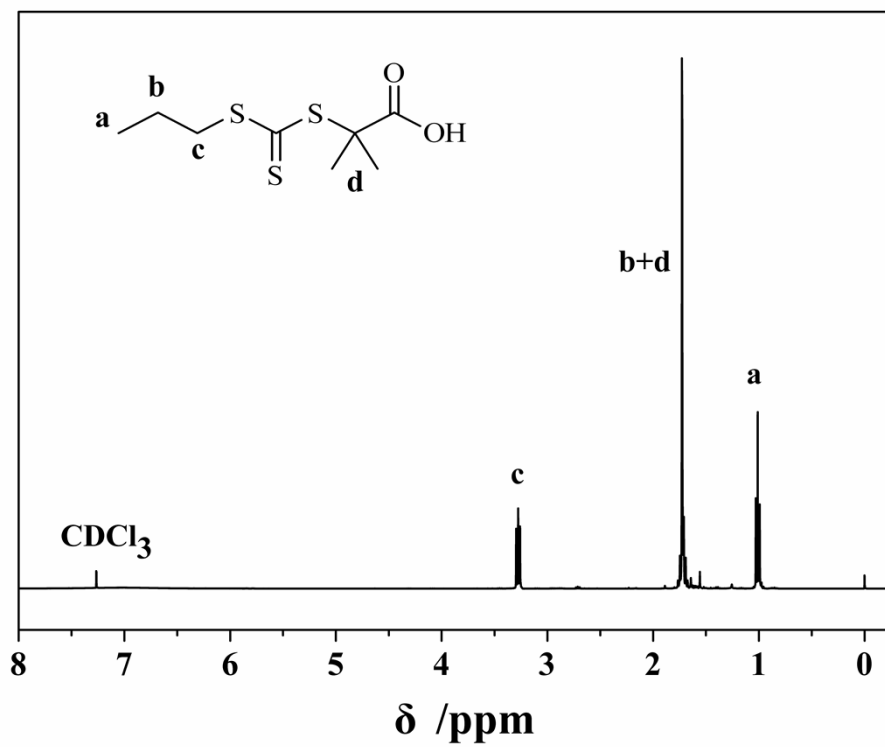

Figure S8. <sup>1</sup>H NMR spectra recorded for PTPA in CDCl<sub>3</sub>

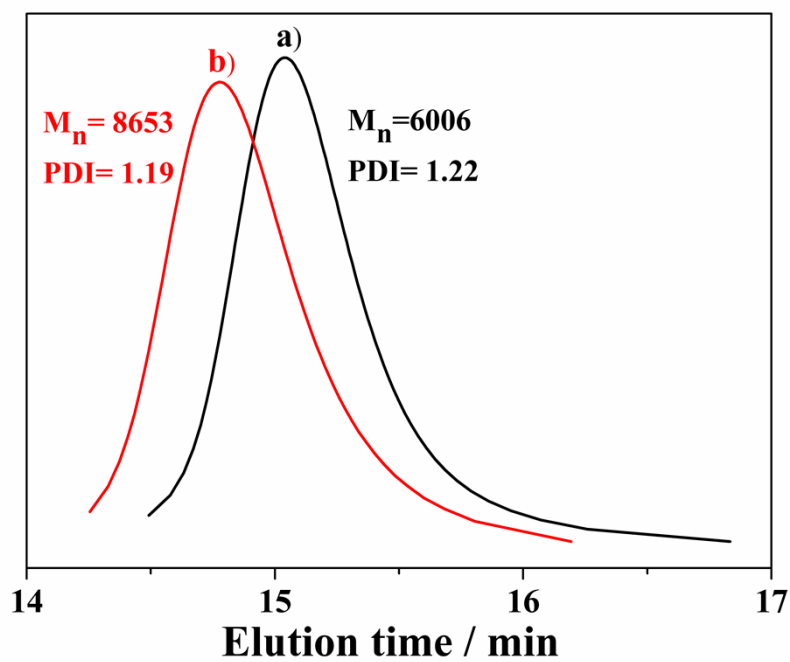

Figure S9. THF GPC traces recorded for (a) PNIPAM-based macroRAFT agent, (b) P[NIPAM]<sub>75</sub>-b-P[R6GDM]<sub>5</sub>

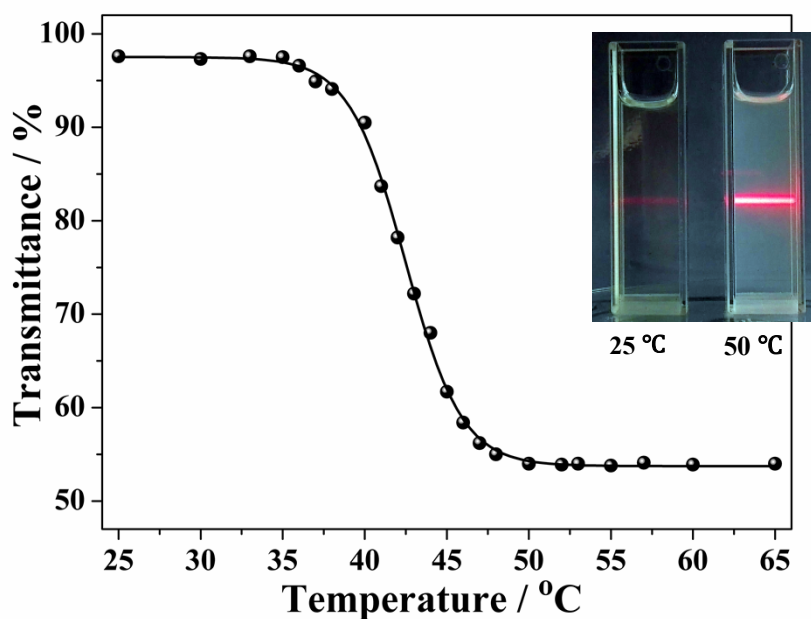

**Figure S10.** Temperature-dependence of optical transmittance recorded at a wavelength of 740 nm for 0.6 g/L aqueous solutions of P[NIPAM]<sub>75</sub>-b-P[R6GDM]<sub>5</sub> diblock copolymers. The inset shows the Tyndall light scattering experiment for 0.6 g/L aqueous solutions of P[NIPAM]<sub>75</sub>-b-P[R6GDM]<sub>5</sub> at 25 °C and 50 °C, respectively.

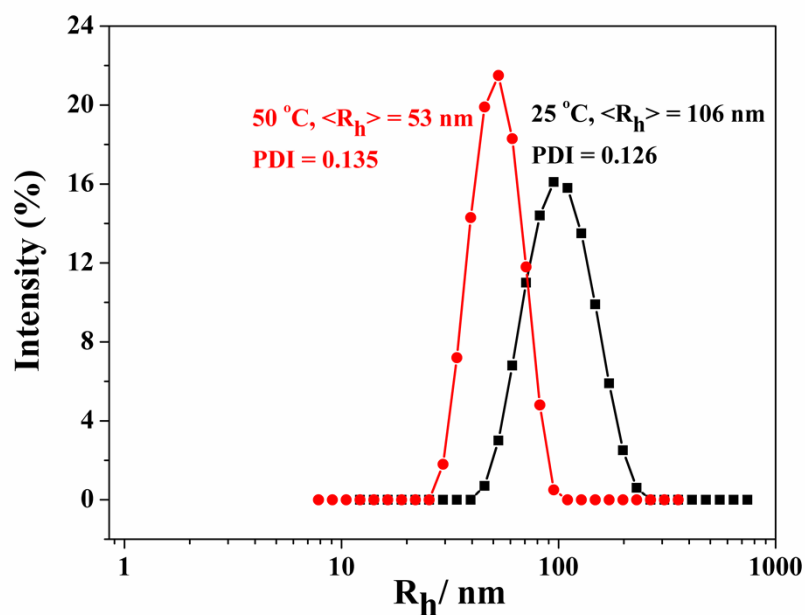

**Figure S11.** Hydrodynamic radius distributions, Intensity (%), recorded for the micellar solution of P[NIPAM]<sub>75</sub>-b-P[R6GDM]<sub>5</sub> (0.2 g/L) at 25 °C and 50 °C, respectively.

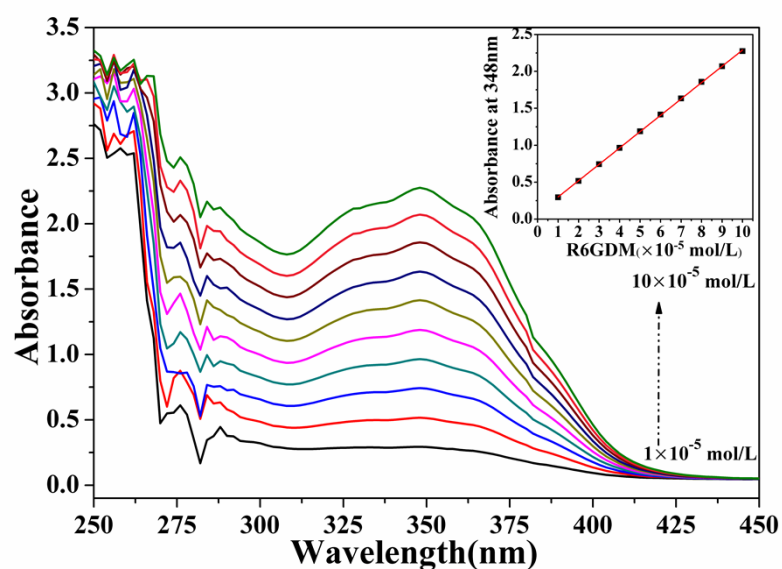

**Figure S12.** Absorption spectra of R6GDM in DMF solution (concentrations ranging from  $1 \times 10^{-5}$  mol/L to  $10 \times 10^{-5}$  mol/L) recorded at 25 °C. Inset: changes in the absorption intensity at 348 nm.

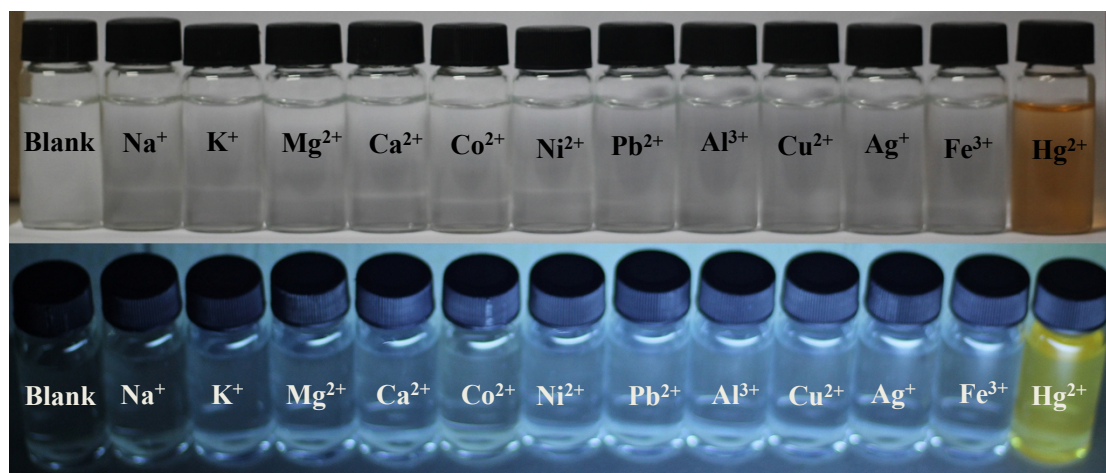

**Figure S13.** Optical photographs recorded under visible light (top) and UV (365 nm, bottom) for aqueous solutions (pH 7, 25 °C) of P[NIPAM]<sub>75</sub>-b-P[R6GDM]<sub>5</sub> within 5 h upon addition of 4.0 equiv. of Hg<sup>2+</sup>, Fe<sup>3+</sup>, Ag<sup>+</sup>, Cu<sup>2+</sup>, Al<sup>3+</sup>, Pb<sup>2+</sup>, Ni<sup>2+</sup>, Co<sup>2+</sup>, Ca<sup>2+</sup>, Mg<sup>2+</sup>, K<sup>+</sup> and Na<sup>+</sup>, respectively.



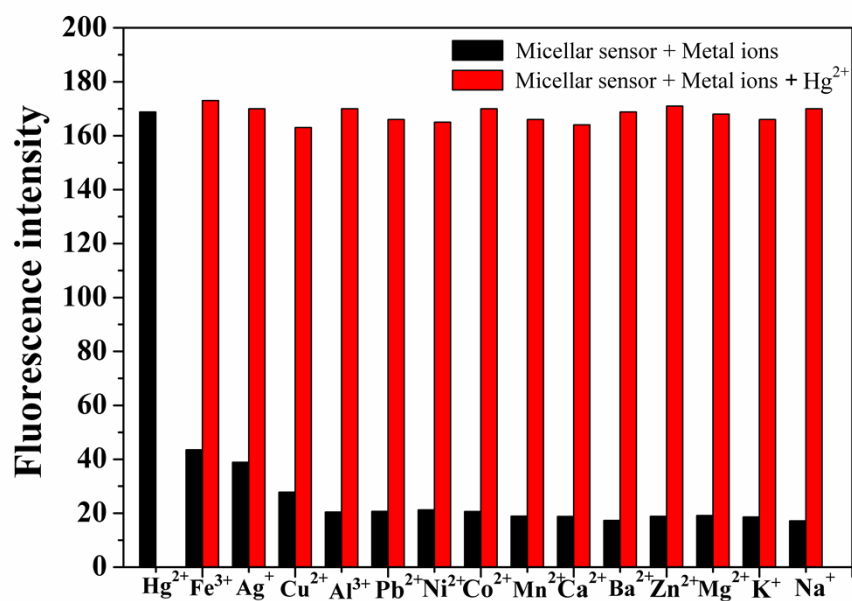

**Figure S14.** The fluorescence intensity at 574 nm of 0.4 g/L aqueous solution of P[NIPAM]<sub>75</sub>-b-P[R6GDM]<sub>5</sub> (pH 7, 25 °C) with 4.0 equiv (relative to R6GDM moieties) of various metal ions (black bars), and then with addition of 4.0 equiv (relative to R6GDM moieties) of Hg<sup>2+</sup> (red bars) .

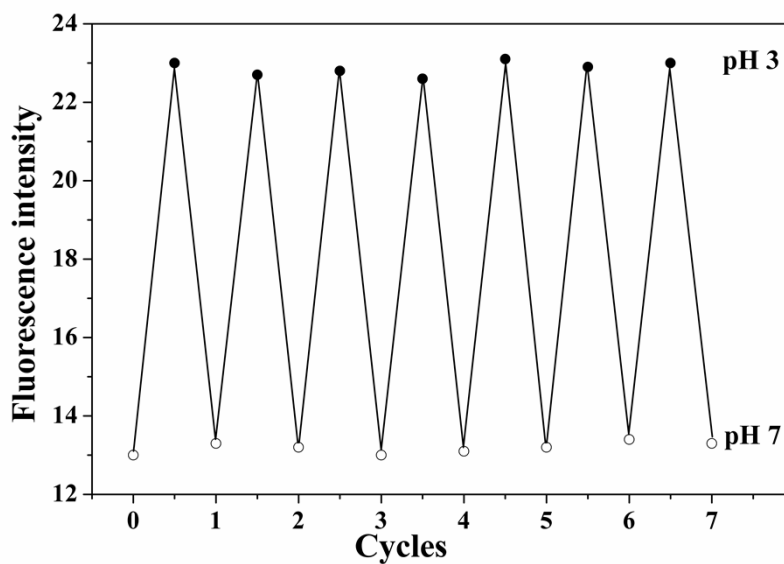

**Figure S15.** Changes in fluorescence emission intensity recorded for 0.2 g/L aqueous solution of P[NIPAM]<sub>75</sub>-b-P[R6GDM]<sub>5</sub> at 25 °C when the solution pH was cycled between 3 and 7.
